# Supplementary material for: Association of rs10830962 polymorphism with gestational diabetes mellitus risk in a Chinese population
Source: PubMed Central journal article supplement (PMC6440982; doi:10.1038/s41598-019-41605-3), 2019-03-29
Supplement: 41598_2019_41605_MOESM1_ESM.pdf [file 41598_2019_41605_MOESM1_ESM.pdf]

# **Association of rs10830962 polymorphism with gestational diabetes mellitus risk in a Chinese population**

Kaipeng Xie<sup>1†</sup>, Ting Chen<sup>1†</sup>, Yue Zhang<sup>2</sup>, Juan Wen<sup>1</sup>, Xianwei Cui<sup>1</sup>, Lianghui You<sup>1</sup>, Lijun Zhu<sup>1</sup>, Bo Xu<sup>3</sup>, Chenbo Ji<sup>1\*</sup>, Xirong Guo<sup>1\*</sup>

<sup>1</sup> The Affiliated Obstetrics and Gynecology Hospital of Nanjing Medical University, Nanjing Maternity and Child Health Care Hospital, Nanjing, China

<sup>2</sup> School of Information Management, Nanjing University, Nanjing, China

<sup>3</sup> State Key Laboratory of Reproductive Medicine, Institute of Toxicology, Nanjing Medical University, Nanjing, China

† These authors contributed equally to this work.

**\*Corresponding author:** Xirong Guo, Nanjing Maternity and Child Health Care Institute, Nanjing Maternity and Child Health Care Hospital Affiliated to Nanjing Medical University, Nanjing, 210004, China, Tel (Fax): 86-25-8446-0507, E-mail: xrguo@njmu.edu.cn, or Chenbo Ji, Nanjing Maternity and Child Health Care Institute, Nanjing Maternity and Child Health Care Hospital Affiliated to Nanjing Medical University, Nanjing, 210004, China, Tel (Fax): 86-25-8446-0507, E-mail: chenboji@njmu.edu.cn.

**Supplementary Table S1. Genotyping results of three SNPs in GDM cases and controls**

| SNP        | Allele <sup>a</sup> | MAF <sup>b</sup> | MAF <sup>c</sup> | HWE <sup>d</sup> | Call rate | Cases <sup>e</sup><br>N = 964 | Control <sup>e</sup><br>N=1021 |
|------------|---------------------|------------------|------------------|------------------|-----------|-------------------------------|--------------------------------|
| rs1470579  | A/C                 | 0.289            | 0.253            | 0.054            | 98.14%    | 507/371/71                    | 546/401/52                     |
| rs7754840  | G/C                 | 0.428            | 0.414            | 0.151            | 97.73%    | 310/449/185                   | 353/461/182                    |
| rs10830962 | C/G                 | 0.438            | 0.433            | 0.479            | 98.44%    | 278/468/206                   | 316/504/182                    |

<sup>a</sup>Major/minor allele

<sup>b</sup>MAF, minor allele frequency in Chinese Han population based on the 1000 Genomes Project.

<sup>c</sup>MAF, minor allele frequency in controls.

<sup>d</sup>HWE, Hardy-Weinberg equilibrium in controls

<sup>e</sup> Major homozygote/heterozygote/minor homozygote

**Supplementary Table S2. Summary of genomic annotation by HaploReg v4 for SNPs with rs10830962 in high LD ( $r^2 > 0.80$ )**

| <b>Chr</b> | <b>LD<br/>(<math>r^2</math>)</b> | <b>Variants</b>   | <b>ASN<br/>freq</b> | <b>Motifs<br/>changed</b>            | <b>RefSeq<br/>genes</b> |
|------------|----------------------------------|-------------------|---------------------|--------------------------------------|-------------------------|
| 11         | 0.99                             | rs4331050         | 0.45                | 5 altered motifs <sup>a</sup>        | 6.8kb 5' of MTNR1B      |
| 11         | 1.00                             | rs10466351        | 0.45                | HNF1, Hsf, ZEB1                      | 4.8kb 5' of MTNR1B      |
| <b>11</b>  | <b>1.00</b>                      | <b>rs10830962</b> | <b>0.45</b>         | <b>6 altered motifs</b> <sup>b</sup> | 4.4kb 5' of MTNR1B      |
| 11         | 0.99                             | rs7941837         | 0.45                | AP-1, THAP1                          | 3.1kb 5' of MTNR1B      |
| 11         | 0.87                             | rs7945617         | 0.48                | NF-kappaB, Nkx2                      | 2.5kb 5' of MTNR1B      |
| 11         | 0.88                             | rs10830963        | 0.44                | Eomes,TAL1,YY1                       | MTNR1B                  |

<sup>b</sup> The altered motifs included the increased binding affinity of FAC1, Foxa\_known2, Foxp1, HDAC2\_disc6, Zfp105 and the decreased binding affinity of Foxa\_known4.

<sup>b</sup> The altered motifs included the increased binding affinity of DMRT5, Foxl1\_1, HNF1\_6, Hmbox1 and PU.1\_disc1, and the decreased binding affinity of HNF1\_1 and Mef2\_know5.

**Supplementary Table S3. Detailed functional annotation of rs10830962 and its high LD ( $r^2 > 0.80$ ) using PhenoScanner**

| SNP        | Proxy rsID | Proxy Alleles | $r^2$ | Source | Tissue                               | Gene     | N   | Effect Allele | Beta  | SE   | <i>P</i> |
|------------|------------|---------------|-------|--------|--------------------------------------|----------|-----|---------------|-------|------|----------|
| rs10830962 | rs10830962 | C/G           | 1.00  | GTEEx  | Adipose visceral omentum             | SCARNA9  | 185 | C             | -0.24 | 0.08 | 0.0033   |
| rs10830962 | rs4331050  | G/T           | 1.00  | GTEEx  | Adipose visceral omentum             | SCARNA9  | 185 | G             | -0.23 | 0.08 | 0.0041   |
| rs10830962 | rs7941837  | A/T           | 0.96  | GTEEx  | Adipose visceral omentum             | SCARNA9  | 185 | A             | -0.23 | 0.08 | 0.0030   |
| rs10830962 | rs7945617  | T/C           | 0.96  | GTEEx  | Adipose visceral omentum             | SCARNA9  | 185 | T             | -0.23 | 0.08 | 0.0037   |
| rs10830962 | rs10830961 | A/G           | 0.96  | GTEEx  | Adipose visceral omentum             | SCARNA9  | 185 | A             | -0.23 | 0.08 | 0.0047   |
| rs10830962 | rs7941837  | A/T           | 0.96  | GTEEx  | Adrenal gland                        | CCDC67   | 126 | A             | 0.25  | 0.09 | 0.0058   |
| rs10830962 | rs7945617  | T/C           | 0.96  | GTEEx  | Adrenal gland                        | CCDC67   | 126 | T             | 0.25  | 0.09 | 0.0058   |
| rs10830962 | rs10466351 | C/T           | 0.86  | GTEEx  | Adrenal gland                        | CCDC67   | 126 | C             | 0.24  | 0.08 | 0.0059   |
| rs10830962 | rs7933855  | G/A           | 0.87  | GTEEx  | Adrenal gland                        | VSTM5    | 126 | G             | -0.30 | 0.11 | 0.0100   |
| rs10830962 | rs10830961 | A/G           | 0.96  | GTEEx  | Artery aorta                         | KIAA1731 | 197 | A             | 0.17  | 0.06 | 0.0055   |
| rs10830962 | rs2166706  | T/C           | 0.84  | GTEEx  | Artery aorta                         | KIAA1731 | 197 | T             | 0.18  | 0.06 | 0.0033   |
| rs10830962 | rs724030   | A/G           | 0.84  | GTEEx  | Artery aorta                         | KIAA1731 | 197 | A             | 0.17  | 0.06 | 0.0041   |
| rs10830962 | rs2166704  | T/A           | 0.84  | GTEEx  | Artery aorta                         | KIAA1731 | 197 | T             | 0.17  | 0.06 | 0.0043   |
| rs10830962 | rs10765575 | A/C           | 0.84  | GTEEx  | Artery aorta                         | KIAA1731 | 197 | A             | 0.17  | 0.06 | 0.0059   |
| rs10830962 | rs2895443  | G/A           | 0.84  | GTEEx  | Artery aorta                         | KIAA1731 | 197 | G             | 0.17  | 0.06 | 0.0042   |
| rs10830962 | rs10830962 | C/G           | 1.00  | GTEEx  | Brain anterior cingulate cortex ba24 | SNORA8   | 72  | C             | -0.23 | 0.08 | 0.0064   |
| rs10830962 | rs4331050  | G/T           | 1.00  | GTEEx  | Brain anterior cingulate cortex ba24 | SNORA8   | 72  | G             | -0.22 | 0.08 | 0.0094   |
| rs10830962 | rs7941837  | A/T           | 0.96  | GTEEx  | Brain anterior cingulate cortex ba24 | SNORA8   | 72  | A             | -0.23 | 0.08 | 0.0058   |
| rs10830962 | rs7945617  | T/C           | 0.96  | GTEEx  | Brain anterior cingulate cortex ba24 | SNORA8   | 72  | T             | -0.23 | 0.08 | 0.0063   |
| rs10830962 | rs10830961 | A/G           | 0.96  | GTEEx  | Brain anterior cingulate cortex ba24 | SNORA8   | 72  | A             | -0.21 | 0.08 | 0.0097   |
| rs10830962 | rs7948640  | C/T           | 0.89  | GTEEx  | Brain anterior cingulate cortex ba24 | SNORA8   | 72  | C             | -0.24 | 0.08 | 0.0045   |
| rs10830962 | rs7948632  | C/T           | 0.89  | GTEEx  | Brain anterior cingulate cortex ba24 | SNORA8   | 72  | C             | -0.24 | 0.08 | 0.0045   |
| rs10830962 | rs11020123 | C/T           | 0.87  | GTEEx  | Brain anterior cingulate cortex ba24 | SNORA8   | 72  | C             | -0.27 | 0.08 | 0.0018   |

|            |            |     |      |       |                                      |        |     |   |       |      |        |
|------------|------------|-----|------|-------|--------------------------------------|--------|-----|---|-------|------|--------|
| rs10830962 | rs7933855  | G/A | 0.87 | GTEEx | Brain anterior cingulate cortex ba24 | SNORA8 | 72  | G | -0.25 | 0.08 | 0.0028 |
| rs10830962 | rs1985254  | T/C | 0.86 | GTEEx | Brain anterior cingulate cortex ba24 | SNORA8 | 72  | T | -0.26 | 0.08 | 0.0029 |
| rs10830962 | rs2121649  | C/T | 0.86 | GTEEx | Brain anterior cingulate cortex ba24 | SNORA8 | 72  | C | -0.25 | 0.08 | 0.0031 |
| rs10830962 | rs10466351 | C/T | 0.86 | GTEEx | Brain anterior cingulate cortex ba24 | SNORA8 | 72  | C | -0.23 | 0.08 | 0.0037 |
| rs10830962 | rs11020116 | A/C | 0.86 | GTEEx | Brain anterior cingulate cortex ba24 | SNORA8 | 72  | A | -0.25 | 0.08 | 0.0028 |
| rs10830962 | rs2166706  | T/C | 0.84 | GTEEx | Brain anterior cingulate cortex ba24 | SNORA8 | 72  | T | -0.24 | 0.08 | 0.0053 |
| rs10830962 | rs724030   | A/G | 0.84 | GTEEx | Brain anterior cingulate cortex ba24 | SNORA8 | 72  | A | -0.24 | 0.08 | 0.0053 |
| rs10830962 | rs2166704  | T/A | 0.84 | GTEEx | Brain anterior cingulate cortex ba24 | SNORA8 | 72  | T | -0.25 | 0.08 | 0.0028 |
| rs10830962 | rs10765575 | A/C | 0.84 | GTEEx | Brain anterior cingulate cortex ba24 | SNORA8 | 72  | A | -0.25 | 0.08 | 0.0030 |
| rs10830962 | rs2895443  | G/A | 0.84 | GTEEx | Brain anterior cingulate cortex ba24 | SNORA8 | 72  | G | -0.25 | 0.08 | 0.0030 |
| rs10830962 | rs1985254  | T/C | 0.86 | GTEEx | Brain caudate basal ganglia          | CCDC67 | 100 | T | -0.24 | 0.09 | 0.0076 |
| rs10830962 | rs2166706  | T/C | 0.84 | GTEEx | Brain caudate basal ganglia          | CCDC67 | 100 | T | -0.24 | 0.09 | 0.0098 |
| rs10830962 | rs724030   | A/G | 0.84 | GTEEx | Brain caudate basal ganglia          | CCDC67 | 100 | A | -0.24 | 0.09 | 0.0098 |
| rs10830962 | rs10830962 | C/G | 1.00 | GTEEx | Brain cerebellum                     | FAT3   | 103 | C | 0.17  | 0.05 | 0.0008 |
| rs10830962 | rs4331050  | G/T | 1.00 | GTEEx | Brain cerebellum                     | FAT3   | 103 | G | 0.17  | 0.05 | 0.0009 |
| rs10830962 | rs7941837  | A/T | 0.96 | GTEEx | Brain cerebellum                     | FAT3   | 103 | A | 0.17  | 0.05 | 0.0006 |
| rs10830962 | rs7945617  | T/C | 0.96 | GTEEx | Brain cerebellum                     | FAT3   | 103 | T | 0.18  | 0.05 | 0.0004 |
| rs10830962 | rs10830961 | A/G | 0.96 | GTEEx | Brain cerebellum                     | FAT3   | 103 | A | 0.17  | 0.05 | 0.0008 |
| rs10830962 | rs7948640  | C/T | 0.89 | GTEEx | Brain cerebellum                     | FAT3   | 103 | C | 0.17  | 0.05 | 0.0028 |
| rs10830962 | rs7948632  | C/T | 0.89 | GTEEx | Brain cerebellum                     | FAT3   | 103 | C | 0.17  | 0.05 | 0.0028 |
| rs10830962 | rs11020123 | C/T | 0.87 | GTEEx | Brain cerebellum                     | FAT3   | 103 | C | 0.18  | 0.05 | 0.0011 |
| rs10830962 | rs7933855  | G/A | 0.87 | GTEEx | Brain cerebellum                     | FAT3   | 103 | G | 0.18  | 0.05 | 0.0011 |
| rs10830962 | rs1985254  | T/C | 0.86 | GTEEx | Brain cerebellum                     | FAT3   | 103 | T | 0.18  | 0.05 | 0.0010 |
| rs10830962 | rs2121649  | C/T | 0.86 | GTEEx | Brain cerebellum                     | FAT3   | 103 | C | 0.17  | 0.05 | 0.0012 |
| rs10830962 | rs10466351 | C/T | 0.86 | GTEEx | Brain cerebellum                     | FAT3   | 103 | C | 0.15  | 0.05 | 0.0026 |
| rs10830962 | rs11020116 | A/C | 0.86 | GTEEx | Brain cerebellum                     | FAT3   | 103 | A | 0.18  | 0.05 | 0.0011 |
| rs10830962 | rs2166706  | T/C | 0.84 | GTEEx | Brain cerebellum                     | FAT3   | 103 | T | 0.16  | 0.05 | 0.0039 |

|            |            |     |      |       |                                       |         |     |   |       |      |        |
|------------|------------|-----|------|-------|---------------------------------------|---------|-----|---|-------|------|--------|
| rs10830962 | rs724030   | A/G | 0.84 | GTEEx | Brain cerebellum                      | FAT3    | 103 | A | 0.16  | 0.05 | 0.0039 |
| rs10830962 | rs2166704  | T/A | 0.84 | GTEEx | Brain cerebellum                      | FAT3    | 103 | T | 0.15  | 0.05 | 0.0044 |
| rs10830962 | rs10765575 | A/C | 0.84 | GTEEx | Brain cerebellum                      | FAT3    | 103 | A | 0.15  | 0.05 | 0.0043 |
| rs10830962 | rs2895443  | G/A | 0.84 | GTEEx | Brain cerebellum                      | FAT3    | 103 | G | 0.16  | 0.05 | 0.0034 |
| rs10830962 | rs10830962 | C/G | 1.00 | GTEEx | Brain hippocampus                     | SNORA8  | 81  | C | -0.22 | 0.08 | 0.0064 |
| rs10830962 | rs4331050  | G/T | 1.00 | GTEEx | Brain hippocampus                     | SNORA8  | 81  | G | -0.21 | 0.08 | 0.0097 |
| rs10830962 | rs7941837  | A/T | 0.96 | GTEEx | Brain hippocampus                     | SNORA8  | 81  | A | -0.22 | 0.08 | 0.0067 |
| rs10830962 | rs7945617  | T/C | 0.96 | GTEEx | Brain hippocampus                     | SNORA8  | 81  | T | -0.22 | 0.08 | 0.0052 |
| rs10830962 | rs7948640  | C/T | 0.89 | GTEEx | Brain hippocampus                     | SNORA8  | 81  | C | -0.21 | 0.08 | 0.0079 |
| rs10830962 | rs7948632  | C/T | 0.89 | GTEEx | Brain hippocampus                     | SNORA8  | 81  | C | -0.21 | 0.08 | 0.0079 |
| rs10830962 | rs2166706  | T/C | 0.84 | GTEEx | Brain hippocampus                     | SNORA8  | 81  | T | -0.23 | 0.08 | 0.0059 |
| rs10830962 | rs724030   | A/G | 0.84 | GTEEx | Brain hippocampus                     | SNORA8  | 81  | A | -0.23 | 0.08 | 0.0059 |
| rs10830962 | rs2166704  | T/A | 0.84 | GTEEx | Brain hippocampus                     | SNORA8  | 81  | T | -0.21 | 0.08 | 0.0097 |
| rs10830962 | rs10765575 | A/C | 0.84 | GTEEx | Brain hippocampus                     | SNORA8  | 81  | A | -0.22 | 0.08 | 0.0086 |
| rs10830962 | rs10830961 | A/G | 0.96 | GTEEx | Brain nucleus accumbens basal ganglia | MED17   | 93  | A | -0.25 | 0.10 | 0.0100 |
| rs10830962 | rs11020123 | C/T | 0.87 | GTEEx | Brain nucleus accumbens basal ganglia | SNORA18 | 93  | C | -0.32 | 0.12 | 0.0080 |
| rs10830962 | rs2895443  | G/A | 0.84 | GTEEx | Brain nucleus accumbens basal ganglia | SNORA18 | 93  | G | -0.35 | 0.12 | 0.0060 |
| rs10830962 | rs10830962 | C/G | 1.00 | GTEEx | Brain nucleus accumbens basal ganglia | TAF1D   | 93  | C | -0.32 | 0.07 | 0.0000 |
| rs10830962 | rs4331050  | G/T | 1.00 | GTEEx | Brain nucleus accumbens basal ganglia | TAF1D   | 93  | G | -0.32 | 0.07 | 0.0000 |
| rs10830962 | rs7941837  | A/T | 0.96 | GTEEx | Brain nucleus accumbens basal ganglia | TAF1D   | 93  | A | -0.30 | 0.07 | 0.0001 |
| rs10830962 | rs7945617  | T/C | 0.96 | GTEEx | Brain nucleus accumbens basal ganglia | TAF1D   | 93  | T | -0.30 | 0.07 | 0.0001 |
| rs10830962 | rs10830961 | A/G | 0.96 | GTEEx | Brain nucleus accumbens basal ganglia | TAF1D   | 93  | A | -0.30 | 0.07 | 0.0001 |
| rs10830962 | rs7948640  | C/T | 0.89 | GTEEx | Brain nucleus accumbens basal ganglia | TAF1D   | 93  | C | -0.30 | 0.08 | 0.0003 |
| rs10830962 | rs7948632  | C/T | 0.89 | GTEEx | Brain nucleus accumbens basal ganglia | TAF1D   | 93  | C | -0.30 | 0.08 | 0.0003 |
| rs10830962 | rs11020123 | C/T | 0.87 | GTEEx | Brain nucleus accumbens basal ganglia | TAF1D   | 93  | C | -0.30 | 0.08 | 0.0002 |
| rs10830962 | rs7933855  | G/A | 0.87 | GTEEx | Brain nucleus accumbens basal ganglia | TAF1D   | 93  | G | -0.30 | 0.08 | 0.0002 |
| rs10830962 | rs1985254  | T/C | 0.86 | GTEEx | Brain nucleus accumbens basal ganglia | TAF1D   | 93  | T | -0.29 | 0.08 | 0.0004 |

|            |            |     |      |       |                                       |         |     |   |       |      |        |
|------------|------------|-----|------|-------|---------------------------------------|---------|-----|---|-------|------|--------|
| rs10830962 | rs2121649  | C/T | 0.86 | GTEEx | Brain nucleus accumbens basal ganglia | TAF1D   | 93  | C | -0.29 | 0.08 | 0.0003 |
| rs10830962 | rs10466351 | C/T | 0.86 | GTEEx | Brain nucleus accumbens basal ganglia | TAF1D   | 93  | C | -0.30 | 0.07 | 0.0001 |
| rs10830962 | rs11020116 | A/C | 0.86 | GTEEx | Brain nucleus accumbens basal ganglia | TAF1D   | 93  | A | -0.30 | 0.08 | 0.0002 |
| rs10830962 | rs2166706  | T/C | 0.84 | GTEEx | Brain nucleus accumbens basal ganglia | TAF1D   | 93  | T | -0.27 | 0.08 | 0.0010 |
| rs10830962 | rs724030   | A/G | 0.84 | GTEEx | Brain nucleus accumbens basal ganglia | TAF1D   | 93  | A | -0.27 | 0.08 | 0.0010 |
| rs10830962 | rs2166704  | T/A | 0.84 | GTEEx | Brain nucleus accumbens basal ganglia | TAF1D   | 93  | T | -0.28 | 0.08 | 0.0006 |
| rs10830962 | rs10765575 | A/C | 0.84 | GTEEx | Brain nucleus accumbens basal ganglia | TAF1D   | 93  | A | -0.28 | 0.08 | 0.0007 |
| rs10830962 | rs2895443  | G/A | 0.84 | GTEEx | Brain nucleus accumbens basal ganglia | TAF1D   | 93  | G | -0.29 | 0.08 | 0.0004 |
| rs10830962 | rs10830962 | C/G | 1.00 | GTEEx | Breast mammary tissue                 | SNORA25 | 183 | C | 0.16  | 0.06 | 0.0094 |
| rs10830962 | rs10830961 | A/G | 0.96 | GTEEx | Breast mammary tissue                 | SNORA25 | 183 | A | 0.17  | 0.06 | 0.0062 |
| rs10830962 | rs7948640  | C/T | 0.89 | GTEEx | Breast mammary tissue                 | SNORA25 | 183 | C | 0.17  | 0.06 | 0.0070 |
| rs10830962 | rs7948632  | C/T | 0.89 | GTEEx | Breast mammary tissue                 | SNORA25 | 183 | C | 0.17  | 0.06 | 0.0070 |
| rs10830962 | rs724030   | A/G | 0.84 | GTEEx | Breast mammary tissue                 | SNORA25 | 183 | A | 0.16  | 0.06 | 0.0097 |
| rs10830962 | rs2166704  | T/A | 0.84 | GTEEx | Breast mammary tissue                 | SNORA25 | 183 | T | 0.16  | 0.06 | 0.0097 |
| rs10830962 | rs2895443  | G/A | 0.84 | GTEEx | Breast mammary tissue                 | SNORA25 | 183 | G | 0.16  | 0.06 | 0.0082 |
| rs10830962 | rs7948640  | C/T | 0.89 | GTEEx | Breast mammary tissue                 | SNORA40 | 183 | C | 0.22  | 0.08 | 0.0079 |
| rs10830962 | rs7948632  | C/T | 0.89 | GTEEx | Breast mammary tissue                 | SNORA40 | 183 | C | 0.22  | 0.08 | 0.0079 |
| rs10830962 | rs10830962 | C/G | 1.00 | GTEEx | Cells transformed fibroblasts         | SNORA18 | 272 | C | -0.14 | 0.04 | 0.0005 |
| rs10830962 | rs4331050  | G/T | 1.00 | GTEEx | Cells transformed fibroblasts         | SNORA18 | 272 | G | -0.14 | 0.04 | 0.0007 |
| rs10830962 | rs7941837  | A/T | 0.96 | GTEEx | Cells transformed fibroblasts         | SNORA18 | 272 | A | -0.12 | 0.04 | 0.0020 |
| rs10830962 | rs7945617  | T/C | 0.96 | GTEEx | Cells transformed fibroblasts         | SNORA18 | 272 | T | -0.12 | 0.04 | 0.0021 |
| rs10830962 | rs10830961 | A/G | 0.96 | GTEEx | Cells transformed fibroblasts         | SNORA18 | 272 | A | -0.11 | 0.04 | 0.0071 |
| rs10830962 | rs7948640  | C/T | 0.89 | GTEEx | Cells transformed fibroblasts         | SNORA18 | 272 | C | -0.14 | 0.04 | 0.0008 |
| rs10830962 | rs7948632  | C/T | 0.89 | GTEEx | Cells transformed fibroblasts         | SNORA18 | 272 | C | -0.14 | 0.04 | 0.0007 |
| rs10830962 | rs11020123 | C/T | 0.87 | GTEEx | Cells transformed fibroblasts         | SNORA18 | 272 | C | -0.15 | 0.04 | 0.0002 |
| rs10830962 | rs7933855  | G/A | 0.87 | GTEEx | Cells transformed fibroblasts         | SNORA18 | 272 | G | -0.13 | 0.04 | 0.0013 |
| rs10830962 | rs1985254  | T/C | 0.86 | GTEEx | Cells transformed fibroblasts         | SNORA18 | 272 | T | -0.13 | 0.04 | 0.0016 |

|            |            |     |      |       |                               |          |     |   |       |      |        |
|------------|------------|-----|------|-------|-------------------------------|----------|-----|---|-------|------|--------|
| rs10830962 | rs2121649  | C/T | 0.86 | GTEEx | Cells transformed fibroblasts | SNORA18  | 272 | C | -0.15 | 0.04 | 0.0003 |
| rs10830962 | rs10466351 | C/T | 0.86 | GTEEx | Cells transformed fibroblasts | SNORA18  | 272 | C | -0.12 | 0.04 | 0.0016 |
| rs10830962 | rs11020116 | A/C | 0.86 | GTEEx | Cells transformed fibroblasts | SNORA18  | 272 | A | -0.15 | 0.04 | 0.0003 |
| rs10830962 | rs2166706  | T/C | 0.84 | GTEEx | Cells transformed fibroblasts | SNORA18  | 272 | T | -0.11 | 0.04 | 0.0056 |
| rs10830962 | rs724030   | A/G | 0.84 | GTEEx | Cells transformed fibroblasts | SNORA18  | 272 | A | -0.12 | 0.04 | 0.0036 |
| rs10830962 | rs2166704  | T/A | 0.84 | GTEEx | Cells transformed fibroblasts | SNORA18  | 272 | T | -0.12 | 0.04 | 0.0022 |
| rs10830962 | rs10765575 | A/C | 0.84 | GTEEx | Cells transformed fibroblasts | SNORA18  | 272 | A | -0.11 | 0.04 | 0.0060 |
| rs10830962 | rs2895443  | G/A | 0.84 | GTEEx | Cells transformed fibroblasts | SNORA18  | 272 | G | -0.13 | 0.04 | 0.0014 |
| rs10830962 | rs10830962 | C/G | 1.00 | GTEEx | Cells transformed fibroblasts | SNORA32  | 272 | C | -0.21 | 0.06 | 0.0013 |
| rs10830962 | rs4331050  | G/T | 1.00 | GTEEx | Cells transformed fibroblasts | SNORA32  | 272 | G | -0.20 | 0.06 | 0.0014 |
| rs10830962 | rs7941837  | A/T | 0.96 | GTEEx | Cells transformed fibroblasts | SNORA32  | 272 | A | -0.19 | 0.06 | 0.0035 |
| rs10830962 | rs7945617  | T/C | 0.96 | GTEEx | Cells transformed fibroblasts | SNORA32  | 272 | T | -0.19 | 0.06 | 0.0030 |
| rs10830962 | rs10830961 | A/G | 0.96 | GTEEx | Cells transformed fibroblasts | SNORA32  | 272 | A | -0.20 | 0.06 | 0.0020 |
| rs10830962 | rs7948640  | C/T | 0.89 | GTEEx | Cells transformed fibroblasts | SNORA32  | 272 | C | -0.23 | 0.07 | 0.0006 |
| rs10830962 | rs7948632  | C/T | 0.89 | GTEEx | Cells transformed fibroblasts | SNORA32  | 272 | C | -0.23 | 0.07 | 0.0006 |
| rs10830962 | rs11020123 | C/T | 0.87 | GTEEx | Cells transformed fibroblasts | SNORA32  | 272 | C | -0.22 | 0.07 | 0.0009 |
| rs10830962 | rs7933855  | G/A | 0.87 | GTEEx | Cells transformed fibroblasts | SNORA32  | 272 | G | -0.22 | 0.07 | 0.0008 |
| rs10830962 | rs1985254  | T/C | 0.86 | GTEEx | Cells transformed fibroblasts | SNORA32  | 272 | T | -0.24 | 0.07 | 0.0003 |
| rs10830962 | rs2121649  | C/T | 0.86 | GTEEx | Cells transformed fibroblasts | SNORA32  | 272 | C | -0.24 | 0.07 | 0.0005 |
| rs10830962 | rs10466351 | C/T | 0.86 | GTEEx | Cells transformed fibroblasts | SNORA32  | 272 | C | -0.17 | 0.06 | 0.0058 |
| rs10830962 | rs11020116 | A/C | 0.86 | GTEEx | Cells transformed fibroblasts | SNORA32  | 272 | A | -0.24 | 0.07 | 0.0003 |
| rs10830962 | rs2166706  | T/C | 0.84 | GTEEx | Cells transformed fibroblasts | SNORA32  | 272 | T | -0.21 | 0.06 | 0.0010 |
| rs10830962 | rs724030   | A/G | 0.84 | GTEEx | Cells transformed fibroblasts | SNORA32  | 272 | A | -0.22 | 0.06 | 0.0006 |
| rs10830962 | rs2166704  | T/A | 0.84 | GTEEx | Cells transformed fibroblasts | SNORA32  | 272 | T | -0.21 | 0.06 | 0.0013 |
| rs10830962 | rs10765575 | A/C | 0.84 | GTEEx | Cells transformed fibroblasts | SNORA32  | 272 | A | -0.20 | 0.06 | 0.0020 |
| rs10830962 | rs2895443  | G/A | 0.84 | GTEEx | Cells transformed fibroblasts | SNORA32  | 272 | G | -0.23 | 0.06 | 0.0004 |
| rs10830962 | rs10830962 | C/G | 1.00 | GTEEx | Colon sigmoid                 | C11orf54 | 124 | C | -0.32 | 0.11 | 0.0047 |



|            |            |     |      |       |                  |          |     |   |       |      |        |
|------------|------------|-----|------|-------|------------------|----------|-----|---|-------|------|--------|
| rs10830962 | rs4331050  | G/T | 1.00 | GTEEx | Colon sigmoid    | C11orf54 | 124 | G | -0.32 | 0.11 | 0.0057 |
| rs10830962 | rs7941837  | A/T | 0.96 | GTEEx | Colon sigmoid    | C11orf54 | 124 | A | -0.30 | 0.11 | 0.0072 |
| rs10830962 | rs7945617  | T/C | 0.96 | GTEEx | Colon sigmoid    | C11orf54 | 124 | T | -0.30 | 0.11 | 0.0080 |
| rs10830962 | rs10830961 | A/G | 0.96 | GTEEx | Colon sigmoid    | C11orf54 | 124 | A | -0.31 | 0.11 | 0.0071 |
| rs10830962 | rs10830962 | C/G | 1.00 | GTEEx | Colon sigmoid    | SCARNA9  | 124 | C | 0.36  | 0.13 | 0.0070 |
| rs10830962 | rs4331050  | G/T | 1.00 | GTEEx | Colon sigmoid    | SCARNA9  | 124 | G | 0.36  | 0.13 | 0.0062 |
| rs10830962 | rs7941837  | A/T | 0.96 | GTEEx | Colon sigmoid    | SCARNA9  | 124 | A | 0.36  | 0.13 | 0.0064 |
| rs10830962 | rs7945617  | T/C | 0.96 | GTEEx | Colon sigmoid    | SCARNA9  | 124 | T | 0.35  | 0.13 | 0.0074 |
| rs10830962 | rs10830961 | A/G | 0.96 | GTEEx | Colon sigmoid    | SCARNA9  | 124 | A | 0.36  | 0.13 | 0.0066 |
| rs10830962 | rs10830962 | C/G | 1.00 | GTEEx | Esophagus mucosa | SLC36A4  | 241 | C | 0.19  | 0.05 | 0.0002 |
| rs10830962 | rs4331050  | G/T | 1.00 | GTEEx | Esophagus mucosa | SLC36A4  | 241 | G | 0.19  | 0.05 | 0.0003 |
| rs10830962 | rs7941837  | A/T | 0.96 | GTEEx | Esophagus mucosa | SLC36A4  | 241 | A | 0.19  | 0.05 | 0.0001 |
| rs10830962 | rs7945617  | T/C | 0.96 | GTEEx | Esophagus mucosa | SLC36A4  | 241 | T | 0.19  | 0.05 | 0.0001 |
| rs10830962 | rs10830961 | A/G | 0.96 | GTEEx | Esophagus mucosa | SLC36A4  | 241 | A | 0.17  | 0.05 | 0.0005 |
| rs10830962 | rs7948640  | C/T | 0.89 | GTEEx | Esophagus mucosa | SLC36A4  | 241 | C | 0.19  | 0.05 | 0.0003 |
| rs10830962 | rs7948632  | C/T | 0.89 | GTEEx | Esophagus mucosa | SLC36A4  | 241 | C | 0.19  | 0.05 | 0.0003 |
| rs10830962 | rs11020123 | C/T | 0.87 | GTEEx | Esophagus mucosa | SLC36A4  | 241 | C | 0.19  | 0.05 | 0.0004 |
| rs10830962 | rs7933855  | G/A | 0.87 | GTEEx | Esophagus mucosa | SLC36A4  | 241 | G | 0.19  | 0.05 | 0.0003 |
| rs10830962 | rs1985254  | T/C | 0.86 | GTEEx | Esophagus mucosa | SLC36A4  | 241 | T | 0.19  | 0.05 | 0.0004 |
| rs10830962 | rs2121649  | C/T | 0.86 | GTEEx | Esophagus mucosa | SLC36A4  | 241 | C | 0.19  | 0.05 | 0.0003 |
| rs10830962 | rs10466351 | C/T | 0.86 | GTEEx | Esophagus mucosa | SLC36A4  | 241 | C | 0.20  | 0.05 | 0.0000 |
| rs10830962 | rs11020116 | A/C | 0.86 | GTEEx | Esophagus mucosa | SLC36A4  | 241 | A | 0.19  | 0.05 | 0.0002 |
| rs10830962 | rs2166706  | T/C | 0.84 | GTEEx | Esophagus mucosa | SLC36A4  | 241 | T | 0.17  | 0.05 | 0.0009 |
| rs10830962 | rs724030   | A/G | 0.84 | GTEEx | Esophagus mucosa | SLC36A4  | 241 | A | 0.17  | 0.05 | 0.0011 |
| rs10830962 | rs2166704  | T/A | 0.84 | GTEEx | Esophagus mucosa | SLC36A4  | 241 | T | 0.17  | 0.05 | 0.0011 |
| rs10830962 | rs10765575 | A/C | 0.84 | GTEEx | Esophagus mucosa | SLC36A4  | 241 | A | 0.16  | 0.05 | 0.0016 |
| rs10830962 | rs2895443  | G/A | 0.84 | GTEEx | Esophagus mucosa | SLC36A4  | 241 | G | 0.16  | 0.05 | 0.0024 |

|            |            |     |      |       |                            |         |     |   |       |      |        |
|------------|------------|-----|------|-------|----------------------------|---------|-----|---|-------|------|--------|
| rs10830962 | rs7948640  | C/T | 0.89 | GTEEx | Liver                      | SLC36A4 | 97  | C | 0.22  | 0.08 | 0.0080 |
| rs10830962 | rs7948632  | C/T | 0.89 | GTEEx | Liver                      | SLC36A4 | 97  | C | 0.22  | 0.08 | 0.0079 |
| rs10830962 | rs11020123 | C/T | 0.87 | GTEEx | Liver                      | SLC36A4 | 97  | C | 0.23  | 0.08 | 0.0063 |
| rs10830962 | rs7933855  | G/A | 0.87 | GTEEx | Liver                      | SLC36A4 | 97  | G | 0.23  | 0.08 | 0.0063 |
| rs10830962 | rs2121649  | C/T | 0.86 | GTEEx | Liver                      | SLC36A4 | 97  | C | 0.22  | 0.08 | 0.0088 |
| rs10830962 | rs11020116 | A/C | 0.86 | GTEEx | Liver                      | SLC36A4 | 97  | A | 0.23  | 0.08 | 0.0066 |
| rs10830962 | rs10830962 | C/G | 1.00 | GTEEx | Nerve tibial               | MED17   | 256 | C | 0.11  | 0.04 | 0.0090 |
| rs10830962 | rs7941837  | A/T | 0.96 | GTEEx | Nerve tibial               | MED17   | 256 | A | 0.12  | 0.04 | 0.0044 |
| rs10830962 | rs7945617  | T/C | 0.96 | GTEEx | Nerve tibial               | MED17   | 256 | T | 0.12  | 0.04 | 0.0042 |
| rs10830962 | rs10466351 | C/T | 0.86 | GTEEx | Nerve tibial               | MED17   | 256 | C | 0.11  | 0.04 | 0.0035 |
| rs10830962 | rs4331050  | G/T | 1.00 | GTEEx | Ovary                      | SNORA18 | 85  | G | 0.24  | 0.09 | 0.0087 |
| rs10830962 | rs10830961 | A/G | 0.96 | GTEEx | Ovary                      | SNORA25 | 85  | A | 0.20  | 0.07 | 0.0091 |
| rs10830962 | rs10830962 | C/G | 1.00 | GTEEx | Pancreas                   | SNORA8  | 149 | C | 0.25  | 0.09 | 0.0078 |
| rs10830962 | rs4331050  | G/T | 1.00 | GTEEx | Pancreas                   | SNORA8  | 149 | G | 0.25  | 0.09 | 0.0078 |
| rs10830962 | rs7941837  | A/T | 0.96 | GTEEx | Pancreas                   | SNORA8  | 149 | A | 0.24  | 0.09 | 0.0082 |
| rs10830962 | rs7945617  | T/C | 0.96 | GTEEx | Pancreas                   | SNORA8  | 149 | T | 0.24  | 0.09 | 0.0079 |
| rs10830962 | rs10466351 | C/T | 0.86 | GTEEx | Pancreas                   | SNORA8  | 149 | C | 0.25  | 0.08 | 0.0036 |
| rs10830962 | rs7941837  | A/T | 0.96 | GTEEx | Pituitary                  | FAT3    | 87  | A | -0.27 | 0.10 | 0.0073 |
| rs10830962 | rs7945617  | T/C | 0.96 | GTEEx | Pituitary                  | FAT3    | 87  | T | -0.27 | 0.10 | 0.0074 |
| rs10830962 | rs2121649  | C/T | 0.86 | GTEEx | Pituitary                  | FAT3    | 87  | C | -0.29 | 0.11 | 0.0094 |
| rs10830962 | rs10466351 | C/T | 0.86 | GTEEx | Pituitary                  | FAT3    | 87  | C | -0.26 | 0.09 | 0.0066 |
| rs10830962 | rs2166706  | T/C | 0.84 | GTEEx | Pituitary                  | FAT3    | 87  | T | -0.31 | 0.10 | 0.0034 |
| rs10830962 | rs724030   | A/G | 0.84 | GTEEx | Pituitary                  | FAT3    | 87  | A | -0.31 | 0.10 | 0.0034 |
| rs10830962 | rs2166704  | T/A | 0.84 | GTEEx | Pituitary                  | FAT3    | 87  | T | -0.30 | 0.10 | 0.0040 |
| rs10830962 | rs10765575 | A/C | 0.84 | GTEEx | Pituitary                  | FAT3    | 87  | A | -0.30 | 0.10 | 0.0044 |
| rs10830962 | rs10830962 | C/G | 1.00 | GTEEx | Skin sun exposed lower leg | SNORA8  | 302 | C | -0.12 | 0.04 | 0.0064 |
| rs10830962 | rs4331050  | G/T | 1.00 | GTEEx | Skin sun exposed lower leg | SNORA8  | 302 | G | -0.12 | 0.04 | 0.0063 |

|            |            |     |      |       |                            |          |     |   |       |      |        |
|------------|------------|-----|------|-------|----------------------------|----------|-----|---|-------|------|--------|
| rs10830962 | rs7941837  | A/T | 0.96 | GTEEx | Skin sun exposed lower leg | SNORA8   | 302 | A | -0.12 | 0.04 | 0.0046 |
| rs10830962 | rs7945617  | T/C | 0.96 | GTEEx | Skin sun exposed lower leg | SNORA8   | 302 | T | -0.13 | 0.04 | 0.0040 |
| rs10830962 | rs10830961 | A/G | 0.96 | GTEEx | Skin sun exposed lower leg | SNORA8   | 302 | A | -0.12 | 0.04 | 0.0060 |
| rs10830962 | rs10466351 | C/T | 0.86 | GTEEx | Skin sun exposed lower leg | SNORA8   | 302 | C | -0.13 | 0.04 | 0.0020 |
| rs10830962 | rs11020123 | C/T | 0.87 | GTEEx | Testis                     | C11orf54 | 157 | C | -0.18 | 0.07 | 0.0086 |
| rs10830962 | rs7933855  | G/A | 0.87 | GTEEx | Testis                     | C11orf54 | 157 | G | -0.18 | 0.07 | 0.0097 |
| rs10830962 | rs1985254  | T/C | 0.86 | GTEEx | Testis                     | C11orf54 | 157 | T | -0.19 | 0.07 | 0.0083 |
| rs10830962 | rs2121649  | C/T | 0.86 | GTEEx | Testis                     | C11orf54 | 157 | C | -0.19 | 0.07 | 0.0084 |
| rs10830962 | rs11020116 | A/C | 0.86 | GTEEx | Testis                     | C11orf54 | 157 | A | -0.18 | 0.07 | 0.0091 |
| rs10830962 | rs2166706  | T/C | 0.84 | GTEEx | Testis                     | C11orf54 | 157 | T | -0.20 | 0.07 | 0.0047 |
| rs10830962 | rs724030   | A/G | 0.84 | GTEEx | Testis                     | C11orf54 | 157 | A | -0.20 | 0.07 | 0.0049 |
| rs10830962 | rs2166704  | T/A | 0.84 | GTEEx | Testis                     | C11orf54 | 157 | T | -0.19 | 0.07 | 0.0063 |
| rs10830962 | rs10765575 | A/C | 0.84 | GTEEx | Testis                     | C11orf54 | 157 | A | -0.18 | 0.07 | 0.0071 |
| rs10830962 | rs2895443  | G/A | 0.84 | GTEEx | Testis                     | C11orf54 | 157 | G | -0.18 | 0.07 | 0.0092 |
| rs10830962 | rs4331050  | G/T | 1.00 | GTEEx | Thyroid                    | VSTM5    | 278 | G | -0.16 | 0.06 | 0.0075 |
| rs10830962 | rs10830961 | A/G | 0.96 | GTEEx | Thyroid                    | VSTM5    | 278 | A | -0.17 | 0.06 | 0.0068 |
| rs10830962 | rs11020123 | C/T | 0.87 | GTEEx | Whole blood                | C11orf54 | 338 | C | 0.07  | 0.03 | 0.0094 |
| rs10830962 | rs7933855  | G/A | 0.87 | GTEEx | Whole blood                | C11orf54 | 338 | G | 0.07  | 0.03 | 0.0065 |
| rs10830962 | rs1985254  | T/C | 0.86 | GTEEx | Whole blood                | C11orf54 | 338 | T | 0.07  | 0.03 | 0.0052 |
| rs10830962 | rs2121649  | C/T | 0.86 | GTEEx | Whole blood                | C11orf54 | 338 | C | 0.07  | 0.03 | 0.0053 |
| rs10830962 | rs11020116 | A/C | 0.86 | GTEEx | Whole blood                | C11orf54 | 338 | A | 0.07  | 0.03 | 0.0091 |
| rs10830962 | rs11020123 | C/T | 0.87 | GTEEx | Whole blood                | SNORA40  | 338 | C | -0.19 | 0.07 | 0.0070 |
| rs10830962 | rs7933855  | G/A | 0.87 | GTEEx | Whole blood                | SNORA40  | 338 | G | -0.20 | 0.07 | 0.0048 |
| rs10830962 | rs1985254  | T/C | 0.86 | GTEEx | Whole blood                | SNORA40  | 338 | T | -0.20 | 0.07 | 0.0060 |
| rs10830962 | rs2121649  | C/T | 0.86 | GTEEx | Whole blood                | SNORA40  | 338 | C | -0.19 | 0.07 | 0.0083 |
| rs10830962 | rs11020116 | A/C | 0.86 | GTEEx | Whole blood                | SNORA40  | 338 | A | -0.19 | 0.07 | 0.0067 |
| rs10830962 | rs2166706  | T/C | 0.84 | GTEEx | Whole blood                | SNORA40  | 338 | T | -0.21 | 0.07 | 0.0024 |

|            |            |     |      |                  |             |         |     |   |       |      |        |
|------------|------------|-----|------|------------------|-------------|---------|-----|---|-------|------|--------|
| rs10830962 | rs724030   | A/G | 0.84 | GTE <sub>x</sub> | Whole blood | SNORA40 | 338 | A | -0.21 | 0.07 | 0.0024 |
| rs10830962 | rs2166704  | T/A | 0.84 | GTE <sub>x</sub> | Whole blood | SNORA40 | 338 | T | -0.21 | 0.07 | 0.0022 |
| rs10830962 | rs10765575 | A/C | 0.84 | GTE <sub>x</sub> | Whole blood | SNORA40 | 338 | A | -0.21 | 0.07 | 0.0021 |
| rs10830962 | rs2895443  | G/A | 0.84 | GTE <sub>x</sub> | Whole blood | SNORA40 | 338 | G | -0.21 | 0.07 | 0.0028 |

---

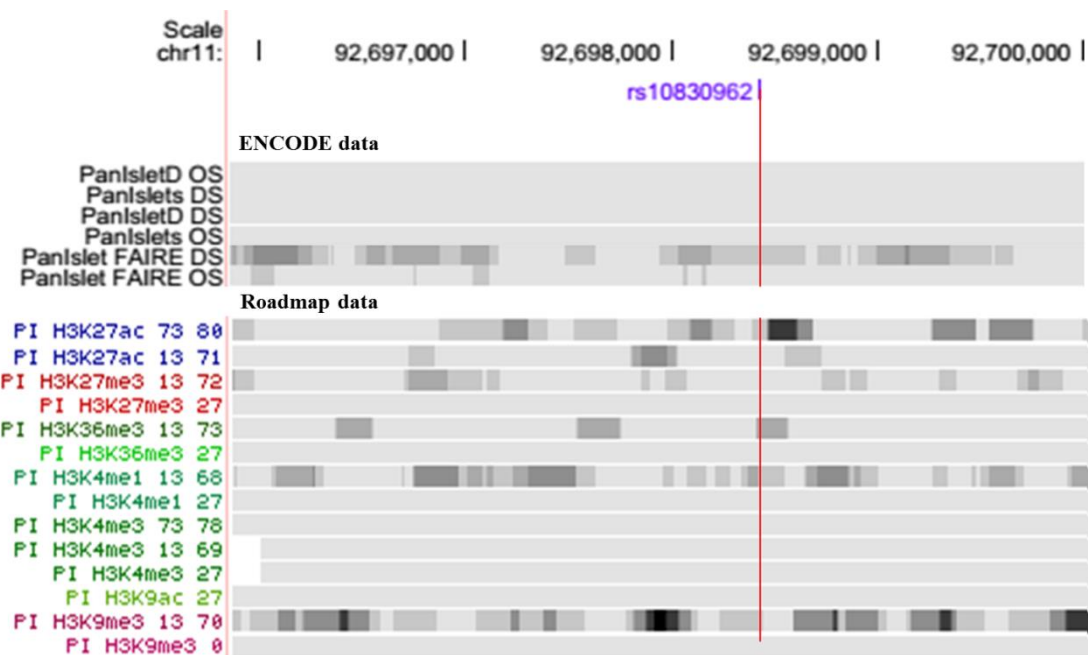

**Supplementary Figure S1. Chromatin features of rs10830962.**

Functional annotation in proximity to rs10830962 location in pancreatic islets (PI) from ENCODE and Roadmap data. DNaseI hypersensitivity (DS) tracks, Formaldehyde-Assisted Isolation of Regulatory Elements (FAIRE) tracks and ChIP-seq tracks (H3K27ac, H3K27me3, H3K36me3, H3K4me1, H3K4me3 and H3K9me3) for histone marks are present. The red vertical lines guide the position of rs10830962. The gray stripes represent the density signal.
